# Supplementary material for: Climate-driven shifts in tree phenology: global patterns, trends, and ecological implications
Source: Royal Society of Chemistry journal article supplement (doi:10.1039/d5va00292c), 2026-01-01
Supplement: d5va00292c1.xlsx [file d5va00292c1.xlsx]

## Sheet: World map coordinates
Country	Latitude	Longitude	Species	Count
Africa	-33.9189	18.4233	5446 trees from 196 species (flowering), 4595 trees from 191 species (fruiting)	1
Australia	-26.8534	133.275	Cleistanthus myrianthus, Myristica globosa, Alstonia scholaris, Syzygium graveolens, Jacaranda mimosifolia, Evergreen broadleaf forest, mixed forest, open shrubland, woody savanna, Nothofagus moorei, Ceratopetalum apetalum, Orites excelsus, Corymbia calophylla	5
Austria	47.0767	15.4214	Acer platanoides, Tilia cordata, Aesculus carnea, Corylus colurna,Larix decidua, Pinus sylvestris, Picea abies	2
Belgium	50.5	4.47	46 individual trees and shrubs, Fagus sylvatica, Betula pendula L. Quercus robur L.	2
Brazil	-14.2429	-53.1319	Ficus adhatodifolia Schott ex Spreng., Ficus eximia Schott, Guarea macrophylla Vahl, Geoffroea spinosa Jacq., Allophylus edulis, Casearia sylvestris, Guarea macrophylla, Mimosa bimucronata, Myrsine coriacea, Myrsine umbellata, Schinus glandulosum, Schinus terebinthifolia, Euterpe edulis Mart., 60 semi-deciduous tree species, Myrcia guianensis, Dalbergia nigra (Vell.) Allemão ex Benth.	8
California	37.7749	122.419	Quercus lobata Nee	1
Cameroon	7.3697	12.3547	Triplochyton scleroxylon K.Schum., Mansonia altissima (A.Chev.) A. Chev., Aningeria altissima (A. Chev.) Aubrév. and Pellegr., Terminalia superba Engl. and Diels., Eribroma oblongum Mast., Entandrophragma cylindricum (Sprague) Sprague., Erythrophleum sauveolens A.Chev., Petersianthus macrocarpus (P.Beauv.) Liben., Klainedoxa gabonensis Pierre., Alstonia boonei De Wild., Pterocarpus soyauxii Taub.	1
Canada	62.3933	96.8181	Acer saccharum, Betula alleghaniensis, Abies balsamea, Betula papyrifera Marsh., Picea glauca	4
Central Europe	49.5	10.5	Abies alba Mill., Picea abies [L.] Karst.,Pinus mugo Turra, Aesculus hippocastanum, Alnus glutinosa, Fraxinus excelsior, Quercus robur, Betula pendula, Fagus sylvatica	4
China	35.8617	104.195	Ginkgo biloba, Acer truncatum, Platanus occidentalis, Fraxinus chinensis, Jasminum nudiflorum, Forsythia suspensa, Viburnum dilatatum, Yulania denudata, Cerasus yedoensis, Amygdalus davidiana, 135 tree species, Prunus armeniaca, Pinus tabuliformis, Acer mono, Cotinus coggygria, Populus bolleana, Ulmus pumila L., Salix babylonica L.	7
Colombia	4.57773	74.299	Hevea brasiliensis (Rubber tree), clones: FX 3864, IAN 710, IAN 873, Henriettea seemannii, Ocotea aurantiodora, Schefflera morototoni, Lacistema aggregatum, Eugenia cf. egensis, Erythroxylum citrifolium, Miconia minutiflora, Miconia rubiginosa	2
Costa Rica	9.7489	83.7534	Tabebuia neochrysantha	1
Cyprus	35.1264	33.4299	Olea europaea L.	1
Democratic Republic of Congo	-2	25	140 tropical tree species	1
Europe	53	9	Aesculus hippocastanum, Alnus glutinosa, Betula pendula, Fagus sylvatica, Fraxinus excelsior, Quercus robur, Populus tremula L., Acer platanoides, Acer pseudoplatanus, Aesculus hippocastanum, Betula pubescens, Larix decidua, Picea abies, Pinus sylvestris, Populus tremula, Sorbus aucuparia, Tilia cordata, Tilia platyphyllos, Quercus petraea, Prunus avium L., Populus koreana, Juglans mandshurica, S…	23
Finland	64.9524	26.0689	Alnus glutinosa, Betula pendula, Quercus robur	2
France	46.2276	2.2137	Fagus sylvatica, Prunus persica	2
Germany	51	10	Quercus petraea, Galanthus nivalis, Prunus spp., Aesculus hippocastanum, Betula pendula , Fagus sylvatica, Quercus robur, Alnus glutinosa, Malus domestica, Pyrus communis, Acer campestre, Tilia cordata, Carpinus betulus, Pericopsis elata	11
Hungary	47.1625	19.5033	Malus domestica	1
India	20.5937	78.9629	Aquilaria malaccensis, Moringa oleifera, Abies spectabilis, Quercus leucotrichophora, Delonix regia, Rhododendron arboreum, Myrica esculenta	7
Indonesia (Sumatra) and Malaysia (Sarawak, Borneo)	-2.51872	118.016	Tropical tree species	1
Ireland	53.4198	-8.24047	Betula pubescens, Corylus avellana	1
Italy (Mediterranean region)	53.4198	-8.24047	Fagus sylvatica L.	1
Japan	36.2048	138.253	Cerasus sp., Acer mono, Quercus crispula, Betula ermanii, Prunus sargentii	4
Latvia	56.9463	24.1051	Malus domestica	1
Madagascar	-18.7679	46.8625	90 common tree species	2
Malaysia	3.139	101.687	Dryobalanops aromatica, Shorea beccariana, Shorea ochracea, Shorea sp., Swintonia foxworthyi, Pentace borneensis	1
Mexico	23.6345	102.553	Aphananthe monoica, Pleuranthodendron lindenii, Psychotria costivenia	1
Mongolia	46.8625	103.847	Populus bolleana, Ulmus pumila, Salix babylonica, Pinus tabulaeformis, Larix sibirica, Pinus sylvestris	2
Norway	62.4722	6.14948	Red Aroma, Summerred, Discovery, Picea abies	2
Ontario, Quebec, Nova Scotia, Newfoundland, Labrador	49.25	-84.5	Pinus strobus L.	1
Portugal	39.5534	7.83932	Quercus suber	1
Puerto Rico	18.2208	66.5901	45 tree species	1
Romania	46	25	Fagus sylvatica	1
Senegal	14.4995	-14.4456	Acacia tortilis	1
Slovakia (Western Carpathians)	48.6667	19.5	Fagus sylvatica L.	1
Slovenia	46.1512	14.9955	Fagus sylvatica L.	1
South Korea	36.5	127.5	Acer palmatum, Ginkgo biloba	1
Southeast Asia	-12.375	88.594	Shorea leprosula, Neobalanocarpus heimii	1
Spain	39.896	2.48769	Betula pendula, Fagus sylvatica, Quercus petraea, Quercus pyrenaica	3
Sweden	62	15	Pinus sylvestris, Picea abies, Betula pubescens, Fagus sylvatica, Quercus robur, Betula sp.	2
Switzerland	46.8182	8.2275	Fagus sylvatica, Fraxinus excelsior, Picea abies, Aesculus hippocastanum, Sorbus aucuparia, Acer pseudoplatanus, Larix decidua, Picea abies	2
Thailand	15.87	100.993	Lannea coromandelica, Sindora siamensis, Dipterocarpus obtusifoliu	2
Uganda	1.3733	32.2903	Chrysophyllum albidum, Celtis spp., Pterygota mildbraedii, Piptadeniastrum africanum, Jacaranda mimosifolia, Tabebuia rosea	3
USA	49.3844	-125	Quercus rubra, Populus angustifolia, Acer rubrum, Acer saccharum, Fraxinus americana, Nyssa sylvatica, Prunus serotina, Quercus alba, Quercus velutina, Larix laricina, Populus tremuloides, Quercus ellipsoidalis, Rhamnus cathartica L., Acacia koa, Metrosideros polymorpha, Cheirodendron trigynum, Coprosma rhynchocarpa, Pinus edulis, Juniperus monosperma, Aesculus flava, Betula alleghaniensis, Betul…	19
Uruguay	-32.5228	55.7658	Olea europae	1
Vietnam	16	106	Shorea siamensis Miq., Shorea obtusa Wall. ex Blume, Dipterocarpus tuberculatus Roxb.	1
West Africa (Sudan-Guinea)	15.5007	32.5599	Tamarindus indica L.	1
				145

## Sheet: Temporal trend supplementary
Year	No. of articles
2004	1
2005	2
2006	1
2007	1
2008	2
2009	0
2010	1
2011	0
2012	2
2013	4
2014	2
2015	7
2016	5
2017	8
2018	11
2019	10
2020	22
2021	18
2022	14
2023	17
2024	17
	145

## Sheet: Sankey diagram supplementary
Climatic driver-Tree species	Tree-species-Phenophase
Temperature [1] Moringa oleifera	Acacia sp. [1] Seed production
Temperature [1] Alstonia sp.	Acacia sp. [1] Leafing
Temperature [1] Aquilaria malaccensis	Alstonia sp. [1] Flowering
Temperature [1] Populus sp.	Alstonia sp. [1] Fruiting
Temperature [1] Syzygium graveolens	Aningeria altissima [1] Flowering
Temperature [1] Shorea sp.	Aningeria altissima [1] Fruiting
Temperature [1] Acacia sp.	Aphananthe monoica [1] Leafing
Temperature [1] Dalbergia nigra	Aphananthe monoica [1] Radial Growth
Temperature [1] Jacaranda mimosifolia	Aquilaria malaccensis [1] Flowering
Temperature [1] Delonix regia	Aquilaria malaccensis [1] Fruiting
Temperature [1] Cleistanthus myrianthus	Aquilaria malaccensis [1] Leafing
Temperature [1] Myristica globosa	Celtis sp. [1] Fruiting
Temperature [1] Neobalanocarpus heimii	Cheirodendron trigynum [1] Seed production
Temperature [1] Plumeria rubra	Cheirodendron trigynum [1] Leafing
Temperature [1] Metrosideros polymorpha	Chrysophyllum albidum [1] Fruiting
Temperature [1] Cheirodendron trigynum	Cleistanthus myrianthus [1] Flowering
Temperature [1] Coprosma rhynchocarpa	Cleistanthus myrianthus [1] Fruiting
Temperature [1] Luehea seemannii	Coprosma rhynchocarpa [1] Seed production
Temperature [1] Ocotea aurantiodora	Coprosma rhynchocarpa [1] Leafing
Temperature [1] Schefflera morototoni	Dalbergia nigra [1] Fruiting
Temperature [1] Lacistema aggregatum	Delonix regia [1] Flowering
Temperature [1] Eugenia egensis	Dipterocarpus sp. [1] Leafing
Temperature [1] Erythroxylum citrifolium	Dryobalanops aromatica [1] Flowering
Temperature [1] Miconia sp.	Entandrophragma cylindricum [1] Flowering
Temperature [1] Dryobalanops aromatica	Entandrophragma cylindricum [1] Fruiting
Temperature [1] Pentace borneensis	Eribroma oblongum [1] Flowering
Temperature [1] Swintonia foxworthyi	Eribroma oblongum [1] Fruiting
Temperature [1] Ficus sp.	Erythrophleum sauveolens [1] Flowering
Temperature [1] Guarea macrophylla	Erythrophleum sauveolens [1] Fruiting
Temperature [1] Aphananthe monoica	Erythroxylum citrifolium [1] Flowering
Temperature [1] Psychotria costivenia	Erythroxylum citrifolium [1] Fruiting
Temperature [1] Chrysophyllum albidum	Eugenia egensis [1] Flowering
Temperature [1] Celtis sp.	Eugenia egensis [1] Fruiting
Temperature [1] Pterygota mildbraedii	Geoffroea spinosa [1] Leafing
Temperature [1] Piptadeniastrum africanum	Geoffroea spinosa [1] Flowering
Temperature [1] Olea sp.	Guarea macrophylla [1] Leafing
Temperature [1] Geoffroea spinosa	Guarea macrophylla [1] Flowering
Temperature [1] Myrsine sp.	Guarea macrophylla [1] Fruiting
Temperature [1] Schinus sp.	Ficus sp. [1] Leafing
Precipitation [1] Aquilaria malaccensis	Ficus sp. [1] Fruiting
Precipitation [1] Shorea sp.	Luehea seemannii [1] Flowering
Precipitation [1] Acacia sp.	Luehea seemannii [1] Fruiting
Precipitation [1] Metrosideros polymorpha	Hevea brasiliensis [1] Leafing
Precipitation [1] Cheirodendron trigynum	Jacaranda mimosifolia [1] Flowering
Precipitation [1] Coprosma rhynchocarpa	Klainedoxa gabonensis [1] Flowering
Precipitation [1] Hevea brasiliensis	Klainedoxa gabonensis [1] Fruiting
Precipitation [1] Luehea seemannii	Lacistema aggregatum [1] Flowering
Precipitation [1] Ocotea aurantiodora	Lacistema aggregatum [1] Fruiting
Precipitation [1] Schefflera morototoni	Lannea coromandelica [1] Leafing
Precipitation [1] Lacistema aggregatum	Mansonia altissima [1] Flowering
Precipitation [1] Eugenia egensis	Mansonia altissima [1] Fruiting
Precipitation [1] Erythroxylum citrifolium	Metrosideros polymorpha [1] Seed production
Precipitation [1] Miconia sp.	Metrosideros polymorpha [1] Leafing
Precipitation [1] Dalbergia nigra	Miconia sp. [1] Flowering
Precipitation [1] Alstonia sp.	Miconia sp. [1] Fruiting
Precipitation [1] Triplochyton scleroxylon	Moringa oleifera [1] Budburst
Precipitation [1] Mansonia altissima	Moringa oleifera [1] Leafing
Precipitation [1] Aningeria altissima	Myristica globosa [1] Flowering
Precipitation [1] Terminalia superba	Myristica globosa [1] Fruiting
Precipitation [1] Eribroma oblongum	Myrsine sp. [1] Leafing
Precipitation [1] Entandrophragma cylindricum	Myrsine sp. [1] Flowering
Precipitation [1] Erythrophleum sauveolens	Myrsine sp. [1] Fruiting
Precipitation [1] Petersianthus macrocarpus	Neobalanocarpus heimii [1] Leafing
Precipitation [1] Klainedoxa gabonensis	Ocotea aurantiodora [1] Flowering
Precipitation [1] Pterocarpus soyauxii	Ocotea aurantiodora [1] Fruiting
Precipitation [1] Dryobalanops aromatica	Olea sp. [1] Flowering
Precipitation [1] Pentace borneensis	Olea sp. [1] Fruiting
Precipitation [1] Swintonia foxworthyi	Pentace borneensis [1] Flowering
Precipitation [1] Ficus sp.	Petersianthus macrocarpus [1] Flowering
Precipitation [1] Lannea coromandelica	Petersianthus macrocarpus [1] Fruiting
Precipitation [1] Sindora siamensis	Piptadeniastrum africanum [1] Fruiting
Precipitation [1] Dipterocarpus sp.	Plumeria rubra [1] Fruiting
Precipitation [1] Guarea macrophylla	Populus sp. [1] Budburst
Precipitation [1] Jacaranda mimosifolia	Populus sp. [1] Flowering
Precipitation [1] Chrysophyllum albidum	Populus sp. [1] Fruiting
Precipitation [1] Celtis sp.	Populus sp. [1] Leafing
Precipitation [1] Pterygota mildbraedii	Prestoea acuminata [1] Flowering
Precipitation [1] Geoffroea spinosa	Prestoea acuminata [1] Flowering
Precipitation [1] Myrsine sp.	Psychotria costivenia [1] Leafing
Precipitation [1] Schinus sp.	Psychotria costivenia [1] Radial Growth
Precipitation [1] Tabebuia sp.	Pterocarpus soyauxii [1] Flowering
Photoperiod [1] Acacia sp.	Pterocarpus soyauxii [1] Fruiting
Photoperiod [1] Metrosideros polymorpha	Pterygota mildbraedii [1] Fruiting
Photoperiod [1] Cheirodendron trigynum	Schefflera morototoni [1] Flowering
Drought [1] Alstonia sp.	Schefflera morototoni [1] Fruiting
Drought [1] Aquilaria malaccensis	Schinus sp. [1] Leafing
Drought [1] Cleistanthus myrianthus	Schinus sp. [1] Flowering
Drought [1] Myristica globosa	Schinus sp. [1] Fruiting
Drought [1] Syzygium graveolens	Shorea sp. [1] Leafing
ENSO [1] Prestoea acuminata	Shorea sp. [1] Flowering
ENSO [1] Shorea sp.	Sindora siamensis [1] Leafing
ENSO [1] Dryobalanops aromatica	Swintonia foxworthyi [1] Flowering
ENSO [1] Pentace borneensis	Syzygium graveolens [1] Flowering
ENSO [1] Swintonia foxworthyi	Syzygium graveolens [1] Fruiting
ENSO [1] Lannea coromandelica	Tabebuia sp. [1] Leafing
ENSO [1] Sindora siamensis	Tabebuia sp. [1] Flowering
ENSO [1] Dipterocarpus sp.	Terminalia superba [1] Flowering
ENSO [1] Geoffroea spinosa	Terminalia superba [1] Fruiting
Light availabilty [1] Hevea brasiliensis	Triplochyton scleroxylon [1] Flowering
Photoperiod [1] Coprosma rhynchocarpa	Triplochyton scleroxylon [1] Fruiting
Photoperiod [1] Guarea macrophylla
Photoperiod [1] Jacaranda mimosifolia
Photoperiod [1] Geoffroea spinosa
Photoperiod [1] Myrsine sp.
Photoperiod [1] Schinus sp.
PAR [1] Acacia sp.
PAR [1] Metrosideros polymorpha
PAR [1] Cheirodendron trigynum
PAR [1] Coprosma rhynchocarpa
Relative humidity [1] Acacia sp.
Relative humidity [1] Luehea seemannii
Relative humidity [1] Ocotea aurantiodora
Relative humidity [1] Schefflera morototoni
Relative humidity [1] Lacistema aggregatum
Relative humidity [1] Eugenia egensis
Relative humidity [1] Erythroxylum citrifolium
Relative humidity [1] Miconia sp.
Soil moisture [1] Acacia sp.
Soil moisture [1] Lannea coromandelica
Soil moisture [1] Sindora siamensis
Soil moisture [1] Dipterocarpus sp.
Soil moisture [1] Tabebuia sp.
Solar radiation [1] Luehea seemannii
Solar radiation [1] Ocotea aurantiodora
Solar radiation [1] Schefflera morototoni
Solar radiation [1] Lacistema aggregatum
Solar radiation [1] Eugenia egensis
Solar radiation [1] Erythroxylum citrifolium
Solar radiation [1] Miconia sp.
Solar radiation [1] Chrysophyllum albidum
Solar radiation [1] Celtis sp.
Solar radiation [1] Pterygota mildbraedii
Solar radiation [1] Piptadeniastrum africanum
Water Stress [1] Tabebuia sp.

## Sheet: Fisher z 1
Phenophase	Species	z Temperature	z Precipitation	z Photoperiod	z Drought	z Relative humidity	z Solar radiation	z Fire sensitivity	z Soil moisture	z Microclimate	z Urban Heat island	z Elevation gradient	z PAR	z Light availability	Var z
Budburst	Populus tremula	-0.950479	0	0.677666	-0.549306	0	0	0	0	-0.30952	0	0.950479	0.792814	0.725005	0.027027
Flowering	Populus tremuloides	-0.618381	0	0	-0.549306	0	0	0	0	-0.30952	0	0.618381	0.423649	0	0.0175439
Flowering	Aquilaria malaccensis	-0.829114	-0.725005	0	-0.549306	0	0	0	0	0	0	0.829114	0.30952	0	0.037037
Flowering	Geoffroea spinosa	0.423649	0.549306	0	-0.549306	0	0	0	0	0	0	-0.423649	0.202733	0	0.0588235
Flowering	Jacaranda mimosifolia	-0.549306	0	0	-0.549306	0.40006	0	0	0	0	-0.4847	0.549306	0	0	0.0222222
Flowering	Olea europaea	-0.810743	0	0	-0.549306	0	-0.549306	0	0	0	0	0.693147	0	0	0.037037
Flowering	Pericopsis elata	-0.758174	-1.09861	0	0	0	0	0.693147	0	0	0	0	0	0	0.0212766
Flowering	Tamarindus indica	-0.632833	0	0	0	0	0	0	0	0	0	0	0	0	0.0103093
Fruiting	Euterpe edulis	-0.775299	0	0	0	0	0	0	0	-0.30952	0	0.775299	0	0	0.037037
Fruiting	Aquilaria malaccensis	0.618381	0.549306	0	0	0	0	0	0	-0.30952	0	0	0	0	0.037037
Fruiting	Acacia koa	0.693147	-0.693147	0	0	0	0	0	0	-0.30952	0	0	0	0	0.0144928
Fruiting	Tamarindus indica	0.632833	0	0	0	0	0	0	0	0	0	0	0.30952	0	0.0103093
Fruiting	Ficus adhatodifolia	-0.693147	0	0	0	0	-0.549306	0	-0.376886	0	0	0	0.100335	0	0.05
Fruiting	Geoffroea spinosa	0.423649	0.549306	0	0	0	0	0	0	0	0	0	0.202733	0	0.0588235
Fruiting	Dodonaea viscosa	0.202733	0	0	0	0	0	0	0	0	0	0	0	0	0.0144928
Fruiting	Pericopsis elata	-0.758174	0	0	-0.423649	0	0	0	0	0	0	0	0.100335	0	0.0212766
Fruiting	Metrosideros polymorpha	0.618381	-0.522984	0	-0.423649	0	0	0	0	0	0	0	0	0	0.0144928
Leafing	Acacia tortilis	-1.09861	0	0	-0.423649	-0.867301	0	0	0	0	0	0.202733	0	0.202733	0.0277778
Leafing	Aquilaria malaccensis	-0.887184	-0.775299	0	0	0	0	0	0	0	0	0.100335	0	0.202733	0.037037
Leafing	Casearia sylvestris	-0.549306	0	-0.549306	0	0	0	0	0	0	0	0.202733	0	0.202733	0.2
Leafing	Dipterocarpus heimii	0.30952	0	0	0	0	0	0.693147	0	0	0	0.202733	0	0.202733	-1
Leafing	Ficus eximia	0.693147	0	0	0	0	0	0	-0.30952	0	0	0	0	0.202733	0.111111
Leafing	Geoffroea spinosa	-0.423649	-0.549306	0	-0.423649	0	0	0	-0.30952	0	0	0	0	0.202733	0.037037
Leafing	Guarea macrophylla	-0.549306	0	-0.549306	0	0	0	0	0	0	0	0	0	0.202733	0.2
Leafing	Hevea brasiliensis	-0.549306	-0.725005	0	0	0	0	0	0	0	0	0	0	0.202733	0.037037
Leafing	Myrsine umbellata	-0.549306	0	-0.549306	0	0	0	0	0	0	0	0	0	0.202733	0.2
Leafing	Mimosa bimucronata	-0.549306	0	-0.549306	0	0	0	0	0	0	0	0	0	0	0.2
Leafing	Myrsine coriacea	-0.549306	0	-0.549306	0	0	0	0	0	-0.202733	0	0	0	0	0.2
Leafing	Allophyllus edulis	-0.829114	-1.09861	-0.829114	0	0	-0.549306	0	0	0	0	0	0.30952	0	0.2
Leafing	Schinus terebinthifolia	-0.549306	0	-0.549306	0	0	0	0	0	0	0	0.30952	0.100335	0	0.2
Leafing	Ficus adhatodifolia	0.693147	-1.22117	0	0	0	0	0	0	0	0	-0.549306	0	0	0.111111
Leafing	Schinus glandulosum	-0.549306	0	-0.549306	0	0	0	0	0	0	0	0	0	0	0.2
Leafing	Shorea leprosula	0.30952	-1.09861	0	0	0	0	0.693147	0	0	0	0	0	0	-1
Leafing	Shorea siamensis	0.202733	0	0	0	0	0	0	0	0	0	0	0	0	0.00980392
Leafing	Tabebuia sp.	-0.4847	0	0	0	0	0	0	0	-0.202733	-0.447692	0	0	0	0.047619
Leafing	Jacaranda mimosifolia	-0.632833	-1.09861	0	0	0.40006	0	0	0	0	-0.4847	0	0	0	0.0222222
Leafing	Shorea obtusa	0.202733	0	0	0	0	0	0	0	0	0	0	0	0	0.00980392
Leafing	Pericopsis elata	-0.758174	0	0	0	0	0	0	0	0	0	0	0	0	0.0212766

## Sheet: Fisher z 2
Temperate
Phenophase	Species	z Temperature	z Precipitation	z Photoperiod	z Drought	z Relative humidity	z Solar radiation	z Fire sensitivity	z Soil moisture	z Microclimate	z Urban Heat island	z Elevation gradient	z PAR	z Light availability	Var z
Leafing	Acer pseudoplatanus	-0.829114	0	0	0	0	-0.549306	0	0	0	0	0	-0.202733	0	0.0212766
Leafing	Acer rubrum	-0.423649	0	0	0	0	0	0	0	0	0	0.549306	0	0	0.037037
Leafing	Betula pendula	-0.847956	0	0	-0.632833	0	0	0	0	0	0	0	0	-0.423649	0.037037
Leafing	Acer saccharum	-0.693147	0	0	0	0	-0.549306	0	0	0	0	0	-0.30952	0	0.037037
Leafing	Betula papyrifera	-0.423649	0	0	0	0	0	0	0	0	0	0	0	0	0.037037
Leafing	Malus domestica	-0.950479	0	0	0	0	0	0	0.30952	0	-0.693147	0	0	0	0.0175439
Leafing	Fagus sylvatika	-0.972955	-0.522984	0	-0.522984	0	0	0	0	0	0	0.907645	0	-0.423649	2.04e-05
Leafing	Fraxinus excelsius	-0.829114	0	0	0	0	0	0	0	-0.549306	0	0	0	0	0.0212766
Leafing	Fagus grandifolia	-0.693147	0	0	0	0	-0.693147	0	0	0	0	0	-0.30952	0	0.037037
Leafing	Larix decidua	-0.792814	0	0	0	0	0	0	0	0	0	0	0	0	0.0212766
Leafing	Juniperus monosperma	0	0	0	0.376886	0	0	0	0.549306	0	0	0	0	0	0.0222222
Leafing	Myrica esculenta	0.907645	0	0	0	0.549306	0	0	0	0	0	0	0	0	0.047619
Leafing	Pinus stobus	-0.662463	0	0	0	0	0	0	0	0	0	0	0	-0.549306	0.00917431
Leafing	Phellodendron amurense	0	0	0	0	0	0	0	0	0	-0.693147	0.549306	0	0	0.037037
Leafing	Pinus edulis	0.662463	0.725005	0	0.741416	0	0.549306	1.09861	0	0	0	0	0	0	0.0222222
Leafing	Quercus robur	-0.775299	0	0.792814	-0.829114	0	0	0	0	0	0	0	0	0	0.0212766
Leafing	Pyrus communis	-0.907645	0	0	0	0	0	0	0	-0.549306	0	0	-0.30952	0	0.0175439
Leafing	Quercus rubra	0.354093	0	0	0	0	0	0	0	0	0	0	0	0	0.0103093
Leafing	Rhododendron arboreum	0.829114	0	0	0	0	0	0	0	0	0	0	0	0	0.047619
Leafing	Quercus leucotrichophora	0.775299	0	0	0	0	0	0	0	0	0	0	0	0	0.047619
Leafing	Sorbus aucuparia	-0.847956	0	0	0	0	-0.618381	0	0	0	0	0	0	0	0.0212766
Flowering	Pinus stobus	-0.662463	0	0	0	0.549306	0	0	0	0	0	0	0	0	0.00917431
Flowering	Corymbia calophylla	0	0	0	0	0	0	1.09861	0	0	-0.693147	0	0	0	0.00100301
Flowering	Galanthus nivalis	-1.02033	0	-0.907645	0	0	0	0	0	0	0	0	0	0	0.00100301
Flowering	Myrica guianensis	-0.867301	-0.867301	-0.810743	0.792814	0	0	0	0	0	0	0	0	0	0.011236
Flowering	Malus domestica	0.972955	0	0	0	0	0	0	0.423649	0	0	0.549306	0	0	0.0175439
Flowering	Myrica esculenta	0.996215	0	0	0	0	0	0	0	-0.549306	0	0	0	0	0.047619
Flowering	Prunus avium	-0.972955	0	1.09861	0	0	0	0	0	0	0	0	0	-0.549306	0.00100301
Flowering	Pyrus communis	0.907645	0	0	0	0	-0.549306	0	0	0	0	0	0	0	0.0175439
Flowering	Quercus leucotrichophora	0.775299	0	0	0	0	0	0	0	0	-0.693147	0	0	0	0.047619
Flowering	Rhododendron arboreum	0.677666	0	0	0	0	0	0	0	0.423649	0	0	0	0	0.047619
Flowering	Prunus persica	-0.618381	0	0	0	0	0	0	0	0	0	0	0	0	0.027027
Flowering	Tilia cordata	0.376886	0	0.40006	0	0.549306	0	0	0	0	0	0	0	0	0.00100301
Fruiting	Pinus stobus	-0.662463	0	0	0	0	0	1.09861	0	0	0	0.549306	0	0	0.00917431
Fruiting	Myrica guianensis	-0.867301	-0.867301	-0.810743	0.792814	0	0	0	0	0	0	0	0	0	0.011236
Fruiting	Malus domestica	-0.972955	0	0	0	0	0	0	0	0	0	0	0	0	0.0175439
Fruiting	Myrica esculenta	-0.632833	0	0	0	0	0	0	0	0	0	0	0	0	0.047619
Fruiting	Sphora chrysophylla	-0.30952	0	0	0	0	-0.423649	0	0.423649	0	0	0.549306	0	0	0.0144928
Fruiting	Pyrus communis	-0.907645	0	0	0	0	0	0	0	0	0	0	0	0	0.0175439
Fruiting	Quercus leucotrichophora	-0.647523	0	0	0	0	0	0	0	0	0	0	0	-0.549306	0.047619
Fruiting	Rhododendron arboreum	-0.792814	-1.09861	0	0	0	0	0	0	0	0	0	0	0	0.047619
Budburst	Acer rubrum	-0.775299	0	0	0	0	0	0	0	0.423649	-0.693147	0	0	0	0.0175439
Budburst	Alnus glutinosa	0	0	0	0	0	0	0	0	0	0	0	-1.15682	0	0.047619
Budburst	Betula pendula	-0.950479	0	0	0	0	0	0	0	0	0	0	-0.792814	0	0.037037
Budburst	Betula ermanii	-0.677666	0	0	0	0.549306	0	0	0	0	0	0	0	0	0.00280112
Budburst	Betula papyrifera	-0.618381	0	0	0	0	0	0	0	0	0	0	0	0	0.0175439
Budburst	Fagus sylvatica	1.22117	0	0	0.810743	0	0	0	0	0	0	1.42193	0	0	0.0103093
Budburst	Larix larcinia	-0.549306	0	0	0	0	0	0	0.423649	0	0	0	0	0	0.0175439
Budburst	Liriodendron tulipifera	0.792814	0	0	0	0	0	0	0	0	0	0	0	-0.549306	0.027027
Budburst	Picea abies	0.847956	0	0	0	0	0	0	0	0	-0.693147	0	0	0	0.00100301
Budburst	Quercus petrea	0.847956	0	0	0	0	0	0	0	0	0	0.907645	0	0	0.0103093
Budburst	Quercus rubra	0	-1.09861	0	0	0	0	0	0	0.423649	0	0	-0.950479	0	0.047619
Budburst	Quercus ellipsoides	-0.618381	-1.09861	0	0	0.549306	0	0	0	0	0	0	0	0	0.0175439
Budburst	Rhamnus cathartica	-0.618381	0	0	0	0	0	0	0	0	0	0	0	0	0.0175439
Budburst	Quercus suber	0	-0.549306	0	0.950479	0	0	0	0.549306	0	0	0	0	0	0.0588235
